# Supplementary material for: Band offset engineering at C2N/MSe2 (M = Mo, W) interfaces
Source: Royal Society of Chemistry journal article supplement (doi:10.1039/d2ra00847e), 2022-01-01
Supplement: d2ra00847e1.pdf [file d2ra00847e1.pdf]

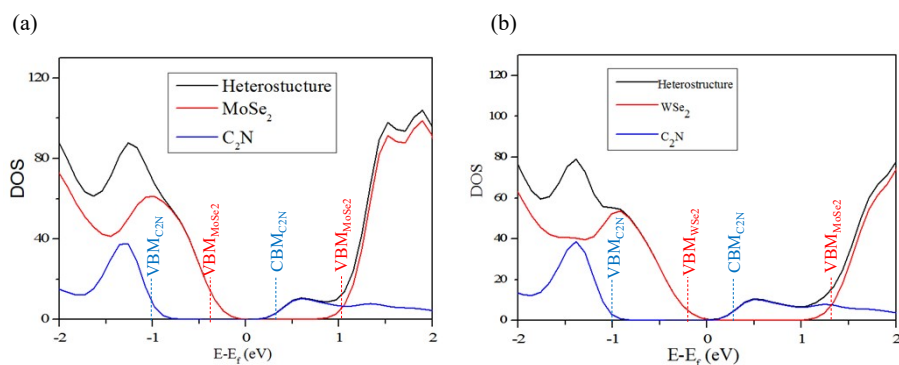

**Figure S1:** Project density of states of (a) C<sub>2</sub>N/MoSe<sub>2</sub> and (b) C<sub>2</sub>N/WSe<sub>2</sub> heterostructures, respectively, at equilibrium geometry.

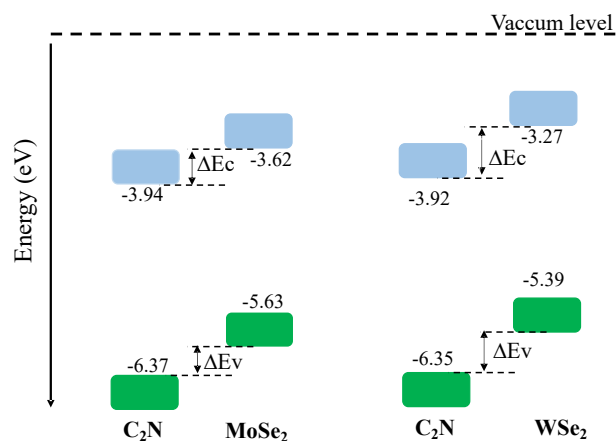

**Figure S2 :** Band alignments of heterostructures at interactive configurations at HSE06 level.

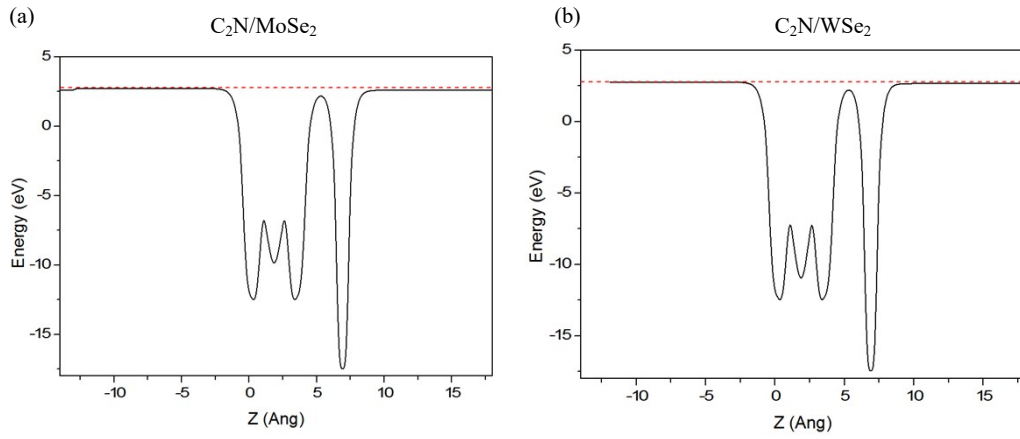

**Figure S3:** Figure S1: Plane-averaged electrostatic potential along the normal direction of (a)  $C_2N/MoSe_2$  and (b)  $C_2N/WSe_2$  heterostructures, respectively, at equilibrium geometry.

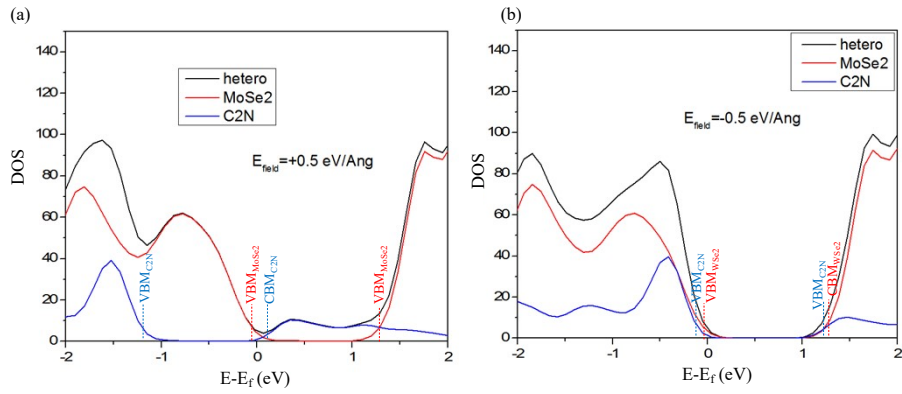

**Figure S4:** Figure S1: Representative Project density of states of  $C_2N/MoSe_2$  heterostructure, at different applied electric field ( $E_{field} = -0.5$  and  $+0.5$  V/Ang )

## Gibbs free energy

The  $\Delta G_{H^*}$  is estimated by using the following equation (1) [1]:

$$\Delta G_{H^*} = \Delta E_H + \Delta E_{ZPE} - T\Delta S_H \quad (1)$$

where  $\Delta E_H$  is the differential hydrogen adsorption energy, which is defined as:

$$\Delta E_H = E(\text{C}_2\text{N} + \text{H}) - E(\text{C}_2\text{N}) - E(\text{H}_2) / 2 \quad (2)$$

where  $E(\text{C}_2\text{N} + \text{H}) - E(\text{C}_2\text{N})$  are total energies of the C<sub>2</sub>N monolayer (or heterostructures) with and without hydrogen adsorption.  $T$  denotes room temperature and  $\Delta S_H$  is considered as half of the entropy of H<sub>2</sub> in the gas phase under standard conditions.  $\Delta E_{ZPE}$  denotes zero-point energy difference between adsorbed hydrogen and gas-phase hydrogen.  $\Delta E_{ZPE} - T\Delta S_H$  is about 0.24 eV.

[1] Shao, Y.; Shi, X.; Pan, H. Electronic, Magnetic, and Catalytic Properties of Thermodynamically Stable Two-Dimensional Transition-Metal Phosphides. *Chem. Mater.* **2017**, *29*, 8892–8900.
